# Supplementary material
Source: PubMed Central journal article supplement (PMC3031723)
Supplement: NIHMS265527-supplement-02.pdf [file NIHMS265527-supplement-02.pdf]

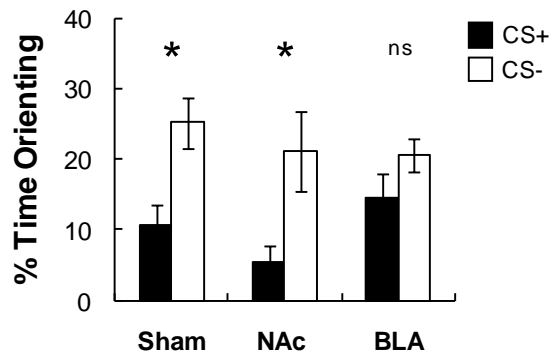

**Figure S1.** Conditioning orienting in Pavlovian fear. Mean  $\pm$  SEM percent time orienting during CS- and CS+ in the final discrimination block. BLA lesions disrupted discriminative orienting between CS+ and CS-. ANOVA (cue  $\times$  lesion) for mean percent time orienting on the final two-day block of conditioning revealed significant effects of cue ( $F_{(2,48)} = 21.72$ ,  $p < 0.01$ ). Post-hoc comparisons found that Sham and NAc rats oriented significantly more during CS- than CS+ ( $p < 0.05$ ) while BLA rats failed to discriminate ( $p > 0.1$ ).
